# Supplementary material for: Evaluating Trade-Offs in Ecosystem Services for Blue–Green–Grey Infrastructure Planning
Source: MDPI journal article supplement (doi:10.3390/su16010203), 2023-12-25
Supplement: s1 [file s1]

Archive with 1 entries (1 files):
- sustainability-2704597-supplementary.pdf
